# Supplementary material for: Durable polymer solar cells produced by the encapsulation of a WSe2 hole-transport layer and β-carotene as an active layer additive
Source: Royal Society of Chemistry journal article supplement (doi:10.1039/d1qi01458g), 2022-01-01
Supplement: d1qi01458g1.pdf [file d1qi01458g1.pdf]

## Supplementary Information

### **Durable polymer solar cells produced by encapsulation of WSe<sub>2</sub> hole-transport layer and $\beta$ -Carotene as active layer additive**

*Xuan Zheng<sup>a\*</sup>, Xin Miao<sup>a</sup>, Yufei Xiao<sup>a</sup>, Lei Guo<sup>a</sup>, Yalin Wang<sup>a</sup>, Tao Hu<sup>a</sup>, Xinghou Gong<sup>a</sup>, Chonggang Wu<sup>a</sup>, Chuanxi Xiong<sup>b</sup>*

*<sup>a</sup> Hubei Provincial Key Laboratory of Green Materials for Light Industry, Collaborative Innovation Center of Green Lightweight Materials and Processing, and School of Materials and Chemical Engineering, Hubei University of Technology, Wuhan, 430068, China*

*<sup>b</sup> State Key Laboratory of Advanced Technology for Materials Synthesis and Processing, Wuhan University of Technology, Wuhan, 430070, China*

*E-mail address: zx88@hbut.edu.cn*

## EXPERIMENTAL SECTION

### 1 Methods

#### 1.1 Liquid-phase exfoliation of WSe<sub>2</sub>

100 mg of bulk WSe<sub>2</sub> powders (5  $\mu$ m, purity >98 %, Sigma-Aldrich) were dispersed in the NaOH/urea (molar ratio = 1 : 2) dispersion. After that, 200 mL of the WSe<sub>2</sub> dispersion were moved to a 500 mL glass beaker, where WSe<sub>2</sub> powders were exfoliated and dispersed via pure mechanical stirring at speed of 1200 rpm for 24 h. Besides, the acquired products were divided equally to 50 ml centrifugal tubes, then maintained at 3000 rpm for 15 min. Take advantage of the top half of the dispersion and re-mixed in DMF, subsequently clearing in ultrasonic baths and filtration with abundant DMF, deionized water and ethanol. Finally removed excess solvents in vacuum oven at 50 °C. The yield of WSe<sub>2</sub> nanoflakes (NF-WSe<sub>2</sub>) was figured by eliminating the mass of the residual solid.

#### 1.2 PSCs fabrication

Glass/ITO substrates (resistance = 20  $\Omega$ /sq) were thoroughly washed by ultrasonic machine in deionized water, anhydrous ethanol, acetone, and isopropyl alcohol, respectively. After that, the ablent substrates were uncovered in ultraviolet-ozone chamber for 20 min. In view of the structure and fabrication of PSCs, the 0.5 mg mL<sup>-1</sup> dispersion (IPA) of NF-WSe<sub>2</sub> was spin coated at 1000 rpm for 30 s for limited times to fulfil the stated thickness without other treatment. Besides, PEDOT:PSS (Clevios 4083) was spin coated onto Glass/ITO at 6000 rpm for 60 s and annealed at 150 °C for 5 min in air to form a 40 nm thick film. The processed substrates were all moved into a glovebox. 100 nm thick PCDTBT: PC<sub>71</sub>BM+bCar active layer was achieved by casting 15 mg mL<sup>-1</sup> solution (PCDTBT: PC<sub>71</sub>BM = 1:4 by wt., dissolved in 1, 2-dichlorobenzene with 3 wt. % bCar) at 1400 rpm. Additionally, 90 nm thick PBDB-T: PC<sub>71</sub>BM+bCar active layer was also achieved by casting 20 mg mL<sup>-1</sup> solution (PCDTBT: PC<sub>71</sub>BM = 2: 3 by wt., dissolved in 1, 2-dichlorobenzene with 3 wt. % bCar) at 1100 rpm, and treated by thermal annealing at 150 °C for 10 min. Then, the devices were stored in a glovebox-embedded thermal evaporator and pumped under a background pressure of  $2 \times 10^{-6}$  Torr. At last, a layer of 10 nm Ca and 100 nm thick Ag were thermally deposited as the top electrode through shadow masks by thermal evaporation.

#### 2 Measurements and characterization

The crystallographic planes of related samples were characterized using powder X-Ray diffraction (PXRD) with Cu Ka radiation ( $\lambda = 1.54060$  Å). The high-resolution transmission electron microscopy (HRTEM) images were taken on JEM-2100F at 200 kV accelerating voltage. Elemental mapping and EDS were performed with JSM-5160LV-Vantage typed energy spectrometer. The morphology image was obtained by

a SEM (Hitachi SU8010). X-ray photoelectron spectroscopy (XPS) spectra were obtained with a Ulvac-PHI5000 Versaprobe III spectrometer using a Al k source (1486.6 eV). Film thickness was measured using a spectroscopic ellipsometer (J. A. Woollam, USA). The electronic properties of all films were characterized by ultraviolet photoelectron spectroscopy (UPS) using the He I (21.22 eV) excitation line. The Raman spectra were collected using a HORIBA XploRA plus system with a 633 nm laser. Thermogravimetric analysis and differential scanning calorimetry (TG-DSC) was collected using a TA SDT-Q600 with a heating rate of 10 °C/min from 25 to 800 °C in air flow. The UV-absorption spectra of the WSe<sub>2</sub> dispersion were recorded on a spectrophotometer (Shimadzu UV-2550). AFM images were taken on a Bruker Dimension® Icon Scanning Probe Microscope.

The current density-voltage ( $J-V$ ) curves of the devices were measured with Keithley 2450 source meter unit under 1 sun, the simulated AM 1.5G illumination from a xenon solar simulator (Newport) in air. The light intensity was calibrated with a standard newport standard silicon photovoltaic reference cell. The external quantum efficiency (EQE) measurements were obtained from a QE-3011 system with Newport standard Si diode. Impedance spectra were performed with a PARSTAT 4000A potentiostat and coupled with the Modulab ECS software. The Impedance spectroscopy (IS) data were recorded in the frequency of 1 Hz to 100 kHz by a 10 mV perturbation under dark.

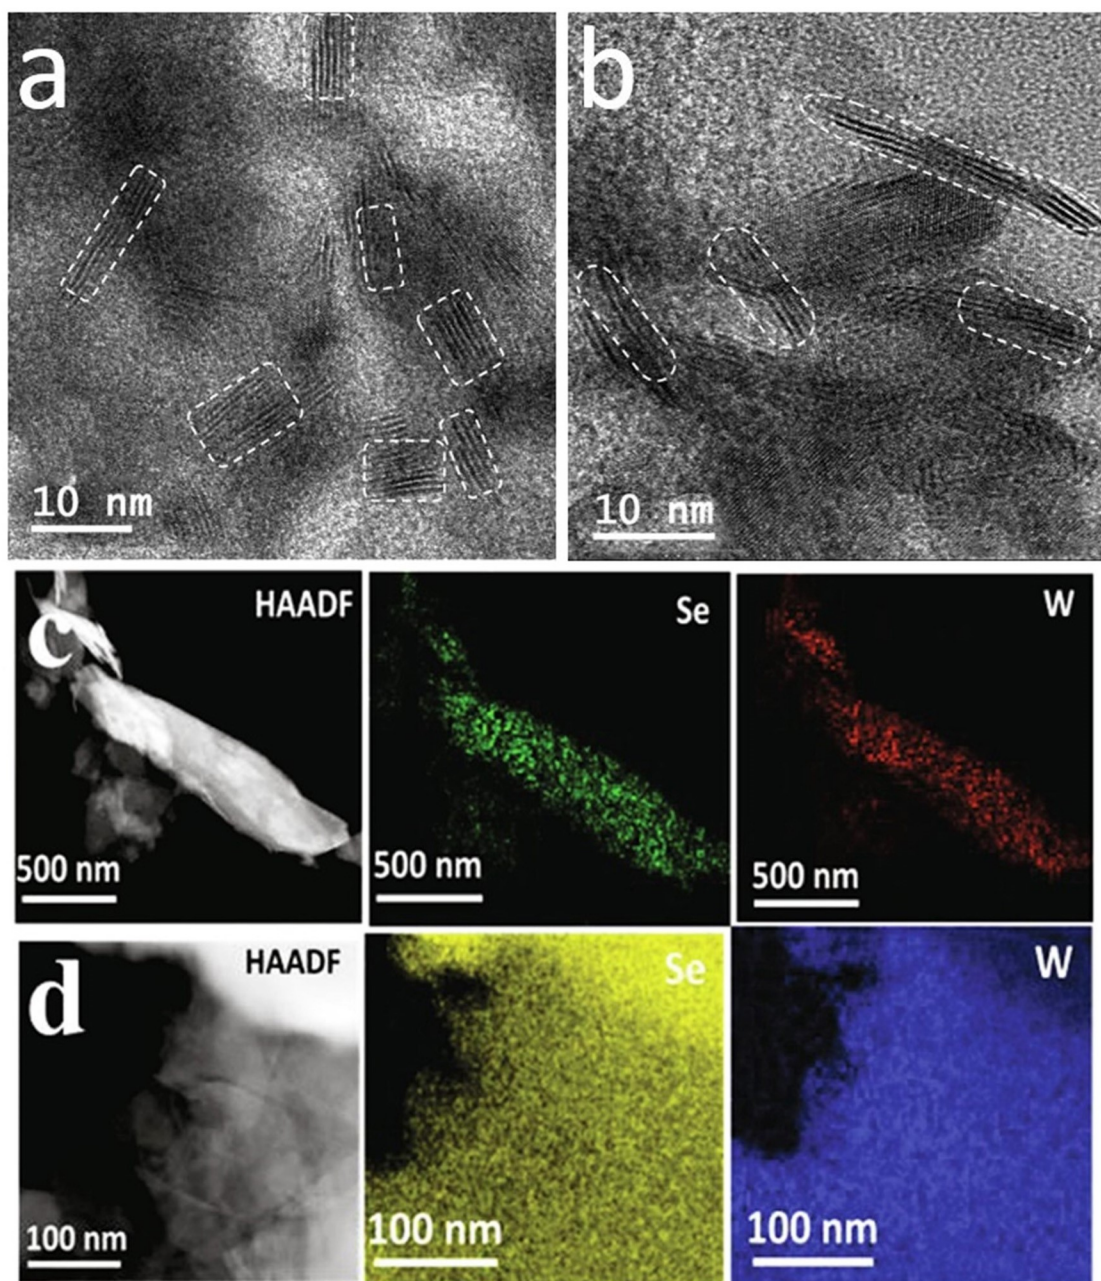

**Fig. s1.** TEM images of obtained NF-WSe<sub>2</sub> nanocrystals (a, b). The HAADF images of obtained NF-WSe<sub>2</sub> and elemental mapping of Se and W, obtained via EDS (c, d).

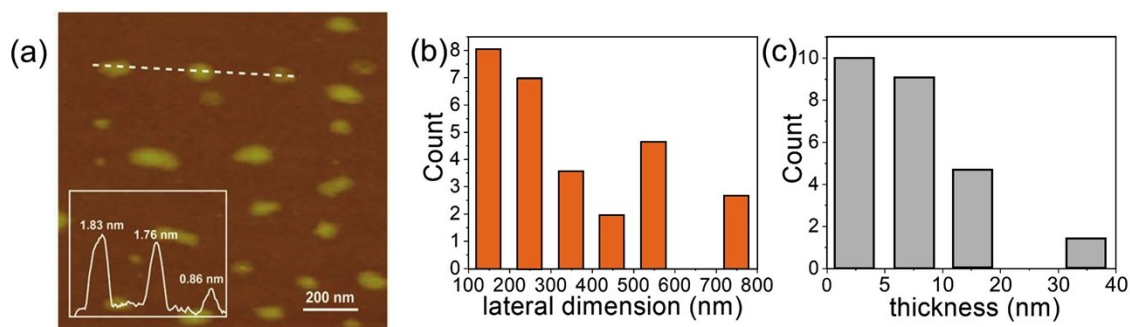

**Fig. s2.** AFM image of obtained NF-WSe<sub>2</sub> nanocrystals (a). Insets: cross section height profiles. Lateral dimension (b) and thickness (c) distributions of NF-WSe<sub>2</sub> flakes extracted from (a).

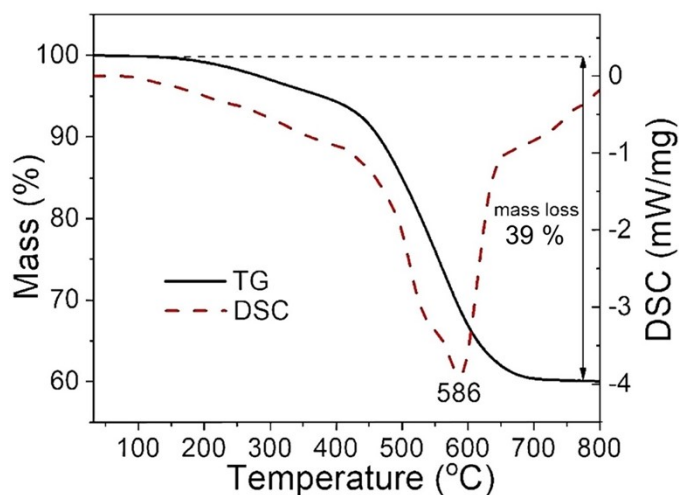

**Fig. s3.** TG-DSC curves of NF-WSe<sub>2</sub> in an air atmosphere. The thermal stability of NF-WSe<sub>2</sub> in air was confirmed by TG-DSC analysis from room temperature to 800 °C under air. As displayed in Fig. S3, the conversion of WSe<sub>2</sub> revised the maximum exothermic peak at about 586 °C and the final mass loss of 39 %. The decline is caused by the oxidation of NF-WSe<sub>2</sub> to solid WO<sub>3</sub> and gaseous SeO<sub>2</sub>.

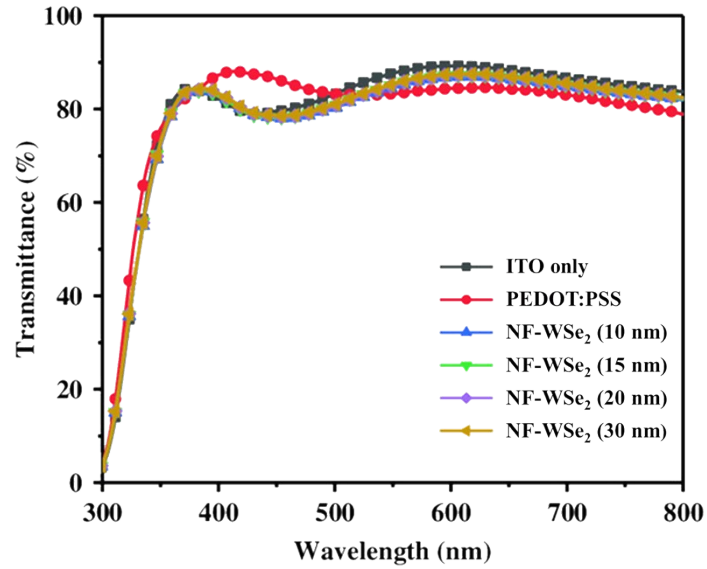

**Fig. s4.** Transmittance spectra of ITO/glass, PEDOT:PSS/ITO/glass and NF-WSe<sub>2</sub>/ITO/glass at various spin-coated thicknesses.

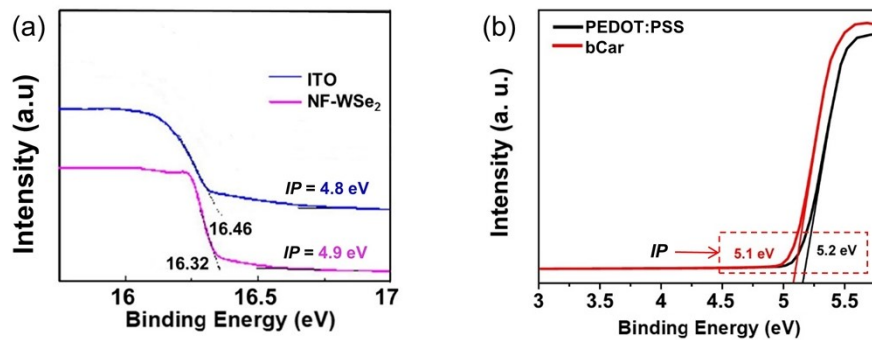

**Fig. s5.** (a) UPS spectra of the secondary electron cut-off regions of bare ITO and NF-WSe<sub>2</sub> and the corresponding Ionization potentials (*IP*). (b) *IP* curves of PEDOT:PSS and bCar transformed from UPS measurement.

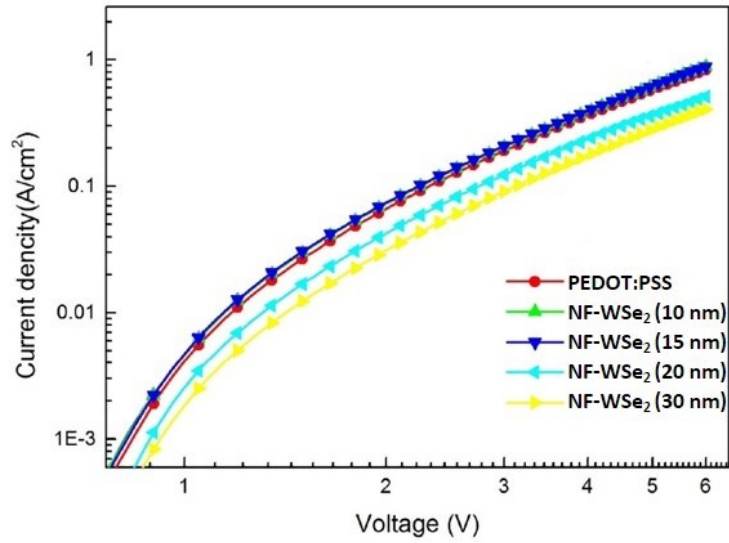

**Fig. s6.**  $J$ - $V$  curves of hole-only devices with the configuration of ITO/NF-WSe<sub>2</sub> or PEDOT:PSS/PCDTBT:PC<sub>71</sub>BM+bCar/MoO<sub>3</sub>/Ag.

**Table s1.** Hole mobility of the hole-only devices calculated by the SCLC method.

| Devices                                                                              | Hole mobility $\mu_h$ (cm <sup>2</sup> V <sup>-1</sup> s <sup>-1</sup> ) |
|--------------------------------------------------------------------------------------|--------------------------------------------------------------------------|
| ITO/PEDOT:PSS/PCDTBT:PC <sub>71</sub> BM+bCar/MoO <sub>3</sub> /Ag                   | $1.33 \times 10^{-4}$                                                    |
| ITO/NF-WSe <sub>2</sub> (10 nm)/PCDTBT:PC <sub>71</sub> BM+bCar/MoO <sub>3</sub> /Ag | $1.25 \times 10^{-4}$                                                    |
| ITO/NF-WSe <sub>2</sub> (15 nm)/PCDTBT:PC <sub>71</sub> BM+bCar/MoO <sub>3</sub> /Ag | $1.21 \times 10^{-4}$                                                    |
| ITO/NF-WSe <sub>2</sub> (20 nm)/PCDTBT:PC <sub>71</sub> BM+bCar/MoO <sub>3</sub> /Ag | $7.68 \times 10^{-5}$                                                    |
| ITO/NF-WSe <sub>2</sub> (30 nm)/PCDTBT:PC <sub>71</sub> BM+bCar/MoO <sub>3</sub> /Ag | $6.52 \times 10^{-5}$                                                    |



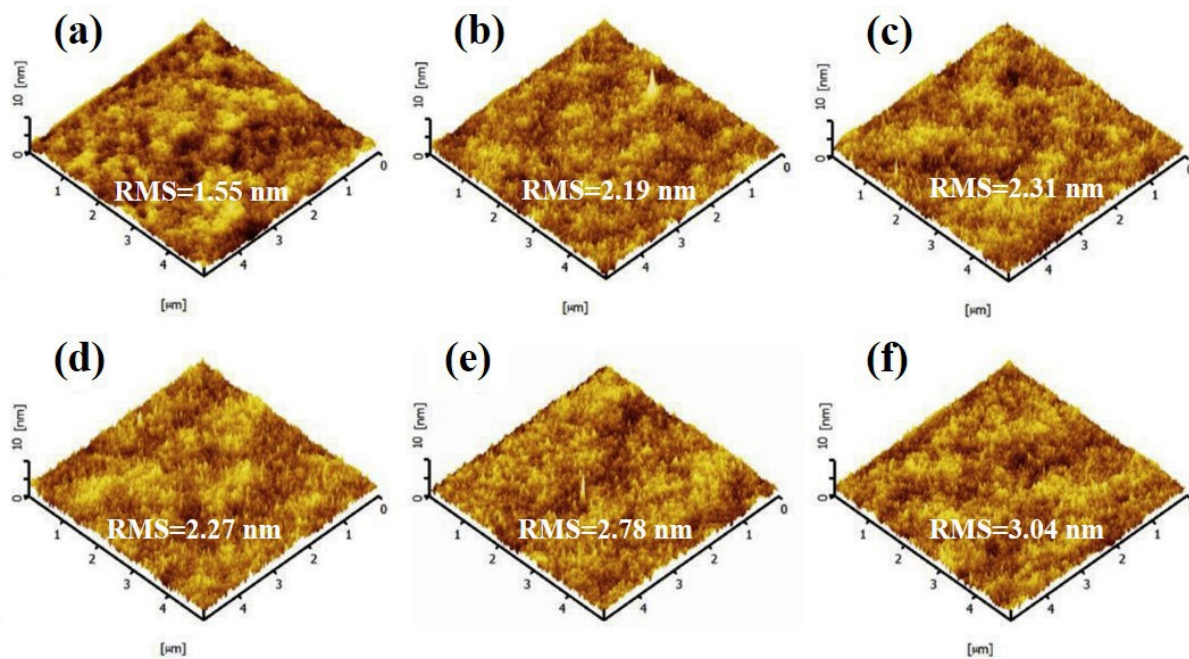

**Fig. s7.** AFM images as tapping-mode topography of ITO(a) , ITO/PEDOT:PSS(b), ITO/NF-WSe<sub>2</sub>(10 nm) (c), (15 nm) (d), (20 nm) (e), (30 nm) (f).



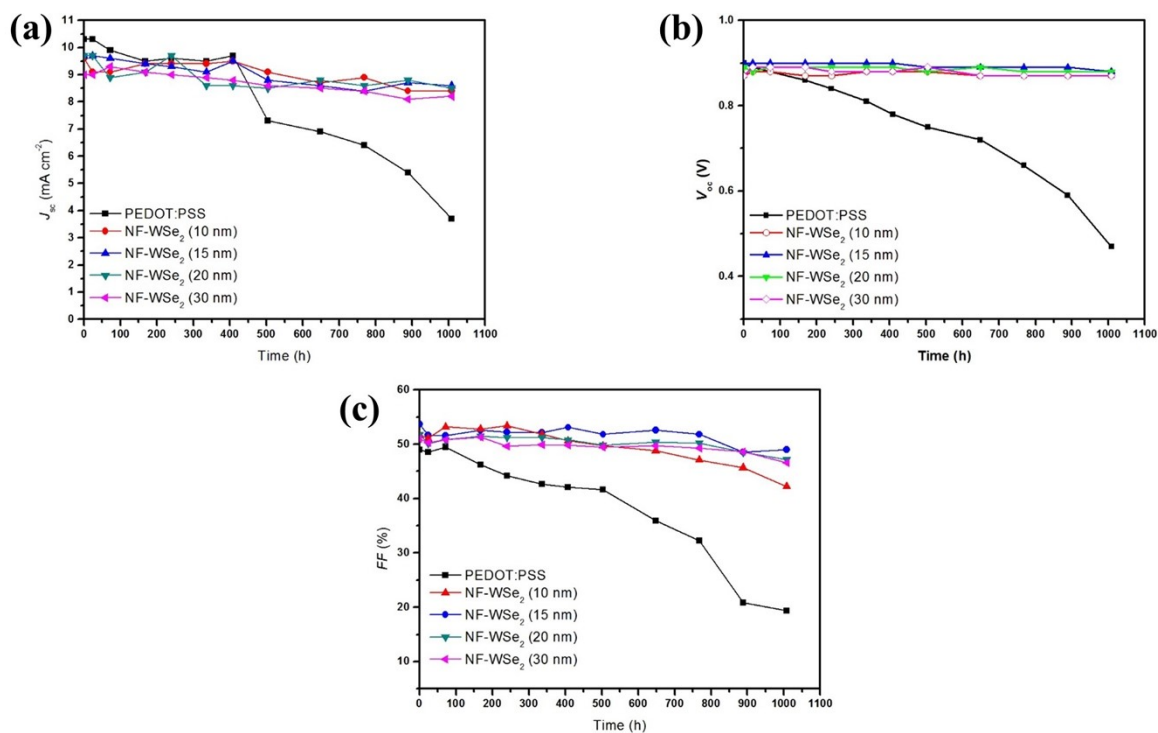

**Fig. s8.** Long term stability analysis of key photovoltaic parameters ( $J_{sc}$ ,  $V_{oc}$ , and  $FF$ ) of PSCs with PEDOT:PSS and NF-WSe<sub>2</sub> at various spin-coated thicknesses.

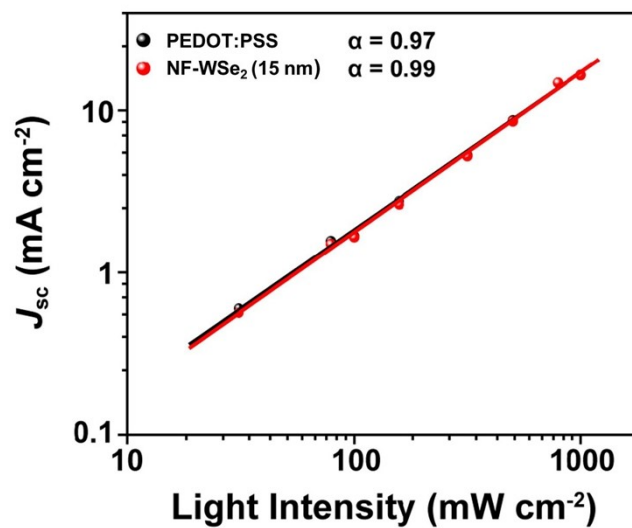

**Fig. s9.**  $J_{sc}$  as a function of light intensity for devices with PEDOT:PSS and NF-WSe<sub>2</sub> (15 nm)

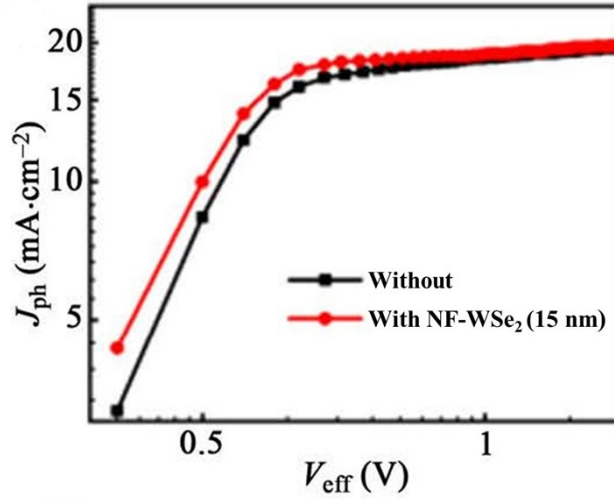

Fig. s10.  $J_{ph}$  versus  $V_{eff}$  curves of NF-WSe<sub>2</sub> devices.

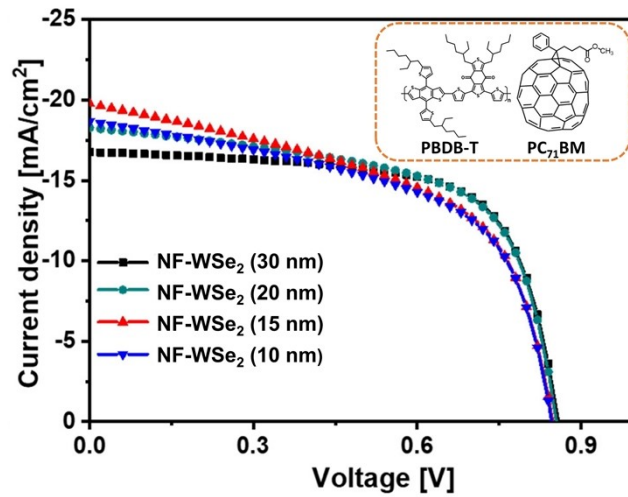

Fig. s11.  $J$ - $V$  characteristics of PSCs made by PBDB-T:PC<sub>71</sub>BM+bCar active layers with NF-WSe<sub>2</sub> for HTL at various spin-coated thicknesses.

Table s2. Summary of photovoltaic operating parameters for PBDB-T:PC<sub>71</sub>BM+bCar PSCs made with different HTLs, measured under illumination of AM 1.5G (100 mW cm<sup>-2</sup>).

| Active layer                    | HTL                         | $J_{sc}$ (mA cm <sup>-2</sup> ) | $V_{oc}$ (V) | $FF$ (%) | $PCE_{max}$ ( $PCE_{avg}$ ) (%) |
|---------------------------------|-----------------------------|---------------------------------|--------------|----------|---------------------------------|
| PBDB-T:PC <sub>71</sub> BM+bCar | NF-WSe <sub>2</sub> (10 nm) | 16.8                            | 0.84         | 56       | 8.2 (8.1±0.09)                  |
|                                 | NF-WSe <sub>2</sub> (15 nm) | 18.1                            | 0.85         | 54       | 8.5 (8.3±0.17)                  |
|                                 | NF-WSe <sub>2</sub> (20 nm) | 19.6                            | 0.85         | 55       | 9.2 (9.1±0.14)                  |
|                                 | NF-WSe <sub>2</sub> (30 nm) | 18.6                            | 0.84         | 55       | 8.7 (8.5±0.15)                  |

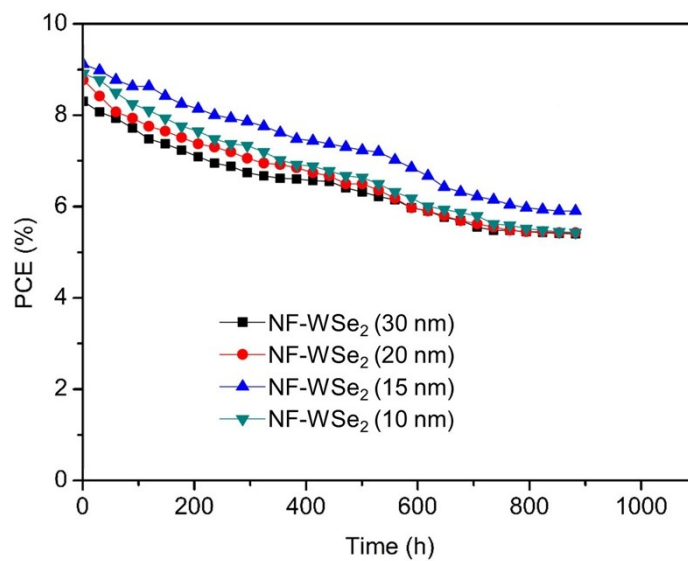

**Fig. s12.** Power conversion efficiency (PCE) of PBDB-T:PC<sub>71</sub>BM+bCar-based PSCs with thickness-dependent NF-WSe<sub>2</sub> for HTL as a function of aging time.

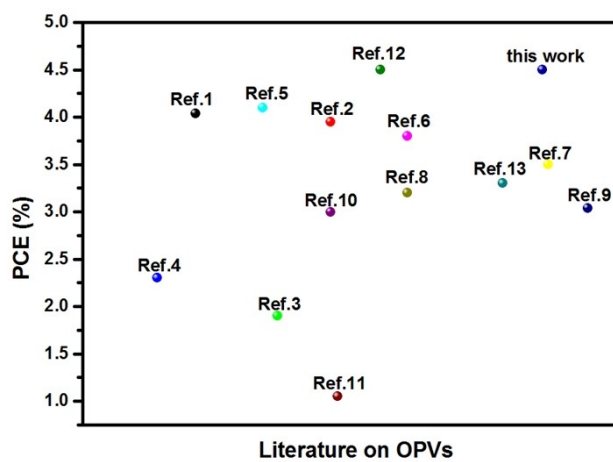

**Fig. s13.** A comparison of the performance with previously reported OPVs based on PCDTBT:PCBM BHJ.

**Table s3.** Comparison of the performance specifications of PCDTBT:PCBM BHJ solar cells in Fig. s9.

| Active layer                              | HTL                      | Thickness of HTL (nm) | PCE (%) | $V_{oc}$ (V) | $J_{sc}$ (mA cm <sup>-2</sup> ) | FF (%) | Resistance value ( $\Omega$ )                                         | Fatigue endurance                        | Ref.             |
|-------------------------------------------|--------------------------|-----------------------|---------|--------------|---------------------------------|--------|-----------------------------------------------------------------------|------------------------------------------|------------------|
| PCDTBT:PC <sub>60</sub> BM                | PEDOT:PSS                | 30–40                 | 4.04    | 0.904        | 7.7                             | 58     | Not shown                                                             | none                                     | [1]              |
| PCDTBT:PC <sub>61</sub> BM                | MoO <sub>3</sub>         |                       | 3.95    | 0.92         | 7.4                             | 58     | Not shown                                                             | none                                     | [2]              |
| PCDTBT:PC <sub>71</sub> BM                | MoO <sub>3</sub>         | 20                    | 1.9     | 0.57         | 8.69                            | 38     | Not shown                                                             | none                                     | [3]              |
| PCDTBT:PC <sub>61</sub> BM                |                          |                       | 2.3     | 0.87         | 5.3                             | 49     | series resistance ( $R_s$ ) is 50                                     | none                                     | [4]              |
| PCDTBT:PC <sub>61</sub> BM                | MoO <sub>3</sub>         | 3                     | 4.1     | 0.871        | 7.8                             | 60     | Not shown                                                             | none                                     | [5]              |
| PCDTBT:PCBM-Ag NPs                        |                          |                       | 3.8     | 0.853        | 7.3                             | 67     | Not shown                                                             | none                                     | [6]              |
| PCDTBT:PC <sub>70</sub> BM                | PEDOT:PSS with Pentacene | 50                    | 3.5     | 0.82         | 9.7                             | 44     | series resistance ( $R_s$ ) is 19                                     | none                                     | [7]              |
| P2:PC <sub>60</sub> BM                    | PEDOT:PSS                |                       | 3.2     | 0.78         | 9.31                            | 44     | Not shown                                                             | none                                     | [8]              |
| PCDTBT:PC <sub>61</sub> BM (PCB)2C2 (30%) | PEDOT:PSS                |                       | 3.04    | 0.95         | 6.4                             | 50     | Not shown                                                             | none                                     | [9]              |
| PCDTBT:PC <sub>61</sub> BM                | PEDOT:PSS                | 20                    | 3.0     | 0.75         | 8.53                            | 43     | Not shown                                                             | none                                     | [10]             |
| PCDTBT:PC <sub>61</sub> BM + PQT-12       | PEDOT:PSS                | 40                    | 1.05    | 0.562        | 5.62                            | 33     | Not shown                                                             | none                                     | [11]             |
| PCDTBT:PC <sub>60</sub> BM                | MoO <sub>3</sub>         | 10                    | 4.5     |              |                                 |        | Not shown                                                             | PCE loss of 40% after 330 h              | [12]             |
| PCDTBT:PC <sub>61</sub> BM                | PEDOT:PSS                | 30                    | 3.3     | 0.7          | 12.5                            | 38     | Not shown                                                             | Less than 40% of initial PCE after 1000h | [13]             |
| PCDTBT:PC <sub>71</sub> BM +bCar          | WSe <sub>2</sub>         | 15                    | 4.5     | 0.89         | 9.7                             | 53.7   | series resistance ( $R_s$ ) is 19; device resistance ( $R_d$ ) is 244 | Above 80% of initial PCE after 1000h     | <b>This work</b> |

## Supporting references

- [1] Aghassi A, Fay C D. Effects of IPA treatment on the photovoltaic performance of bulk heterojunction organic solar cells. *Journal of Physics and Chemistry of Solids*, 2019, 130: 136-143.
- [2] Cai W, Zhong C, Duan C, et al. The influence of amino group on PCDTBT-based and P3HT-based polymer solar cells: Hole trapping processes. *Applied Physics Letters*, 2015, 106(23): 61.
- [3] D'Olieslaeger L, Pfanmüller M, Fron E, et al. Tuning of PCDTBT: PC<sub>71</sub>BM blend nanoparticles for eco-friendly processing of polymer solar cells. *Solar Energy Materials and Solar Cells*, 2017, 159: 179-188.
- [4] Clarke T M, Peet J, Nattestad A, et al. Charge carrier mobility, bimolecular recombination and trapping in polycarbazole copolymer: fullerene (PCDTBT: PCBM) bulk heterojunction solar cells. *Organic Electronics*, 2012, 13(11): 2639-2646.
- [5] Mumyatov A V, Prudnov F A, Sagdullina D K, et al. Bis (pyrrolidino)[60] fullerenes: promising photostable fullerene-based acceptors suppressing light-induced absorber degradation pathways. *Synthetic Metals*, 2021, 271: 116632.
- [6] Piralaee M, Ebrahimpour Z, Asgari A. The improved performance of BHJ organic solar cells by random dispersed metal nanoparticles through the active layer. *Current Applied Physics*, 2020, 20(4): 531-537.
- [7] Sivakumar G, Pratyusha T, Gupta D, et al. Doping of hole transport layer PEDOT: PSS with pentacene for PCDTBT: PCBM based organic solar cells. *Materials Today: Proceedings*, 2017, 4(7): 6814-6819.
- [8] Santos B P S, Lima A B, de Araujo F L, et al. Synthesis of novel low bandgap random and block terpolymers with improved performance in organic solar cells. *Journal of Materials Research and*

Technology, 2021, 10: 51-65.

[9] Schroeder B C, Li Z, Brady M A, et al. Enhancing Fullerene - Based Solar Cell Lifetimes by Addition of a Fullerene Dumbbell. *Angewandte Chemie*, 2014, 126(47): 13084-13089.

[10] Etzold F, Howard I A, Mauer R, et al. Ultrafast exciton dissociation followed by nongeminate charge recombination in PCDTBT: PCBM photovoltaic blends. *Journal of the American Chemical Society*, 2011, 133(24): 9469-9479.

[11] Kumar A, Ratan S, Jarwal D K, et al. Effect of PQT-12 interface layer on the performance of PCDTBT: PCBM bulk heterojunction solar cells. *Materials Research Express*, 2019, 6(11): 115514.

[12] Li Z, Chiu K H, Ashraf R S, et al. Toward improved lifetimes of organic solar cells under thermal stress: Substrate-dependent morphological stability of PCDTBT: PCBM films and devices. *Scientific reports*, 2015, 5(1): 1-9.

[13] Ciammaruchi L, Oliveira R, Charas A, et al. Stability of organic solar cells with PCDTBT donor polymer: An interlaboratory study. *Journal of Materials Research*, 2018, 33(13): 1909-1924.
